# Supplementary material for: AtWRKY22 promotes susceptibility to aphids and modulates salicylic acid and jasmonic acid signalling
Source: PubMed Central journal article supplement (PMC4892728; doi:10.1093/jxb/erw159), 2016-04-23
Supplement: supp_erw159_Supplemental_Tables_S1_S4.pdf [file supp_erw159_Supplemental_Tables_S1_S4.pdf]

**Table S1.** Primers used for PCR and RT-qPCR.

| <b>PCR</b>              |                  |                  |                          |
|-------------------------|------------------|------------------|--------------------------|
| <b>Mutant/insertion</b> | <b>SALK code</b> | <b>Direction</b> | <b>Primer</b>            |
| T-DNA insertion         | LBb1.3           |                  | ATTTTGCCGATTCGGAAC       |
| <i>wrky22-3</i>         | SALK_094892      | Fw               | AAACCCTATATTCACCGTCGG    |
|                         |                  | Rev              | ATATTCCTCCGGTGGTAGTGG    |
| <i>wrky22-4</i>         | SALK_098205      | Fw               | CACAGAACCAGAAACGTCCTC    |
|                         |                  | Rev              | ATATTCCTCCGGTGGTAGTGG    |
| <b>RT-qPCR</b>          |                  |                  |                          |
| <b>Gene name</b>        | <b>AGI code</b>  | <b>Direction</b> | <b>Primer</b>            |
| <i>PEX4</i>             | <i>At5g25760</i> | Fw               | TGCAACCTCCTCAAGTTCG      |
|                         | <i>At5g25760</i> | Rev              | CACAGACTGAAGCGTCCAAG     |
| <i>ACT2</i>             | <i>At3g18780</i> | Fw               | CCCgatGGGCAAGTCATCAGAT   |
|                         | <i>At3g18780</i> | Rev              | GTCTCGTGGATTCCAGCAGCTTCC |
| <i>WRKY22</i>           | <i>At4g01250</i> | Fw               | CATGGCGAAAGTACGGACAG     |
|                         | <i>At4g01250</i> | Rev              | GAATTACGGTGTGTCGGAGC     |
| <i>PDF1.2</i>           | <i>At5G44420</i> | Fw               | TTGCTGCTTTCGACGCA        |
|                         | <i>At5G44420</i> | Rev              | TGTCCCACTTGGCTTCTCG      |
| <i>VSP2</i>             | <i>At5G24770</i> | Fw               | CATAGACTTCGACACGGTGC     |
|                         | <i>At5G24770</i> | Rev              | TTTGCACACGGTTTTGGAGT     |
| <i>PR1</i>              | <i>At2G14610</i> | Fw               | GTTGCAGCCTATGCTCGGAG     |
|                         | <i>At2G14610</i> | Rev              | CCGCTACCCAGGCTAAGTT      |

**Table S2.** Percentage of aphids making long probes (> 25 min) 4.5 hour after inoculation on 344 natural Arabidopsis accessions.

| Genotype | Line          | %  |
|----------|---------------|----|
| CS76214  | Pro-0         | 20 |
| CS28163  | Co-2          | 33 |
| CS28808  | Wag-3         | 33 |
| CS76107  | CAM-16        | 33 |
| CS76127  | Est-1         | 33 |
| CS76287  | UKSE06-429    | 33 |
| CS28214  | Dra-2         | 40 |
| CS28091  | Boot-1        | 50 |
| CS28097  | Bs-2          | 50 |
| CS28160  | Cnt-1         | 50 |
| CS28217  | Ede-1         | 50 |
| CS28345  | Hh-0          | 50 |
| CS28419  | Kr-0          | 50 |
| CS28492  | Mh-0          | 50 |
| CS28633  | PHW-33        | 50 |
| CS28635  | PHW-35        | 50 |
| CS28645  | Pn-0          | 50 |
| CS28725  | Sav-0         | 50 |
| CS28758  | Tha-1         | 50 |
| CS28823  | Ws            | 50 |
| CS76098  | Blh-1         | 50 |
| CS76106  | C24           | 50 |
| CS76150  | Kas-1         | 50 |
| CS76152  | Kelsterbach-4 | 50 |
| CS76165  | LI-OF-095     | 50 |
| CS76172  | LL-0          | 50 |
| CS76190  | Mr-0          | 50 |
| CS76196  | NC-6          | 50 |
| CS76208  | Paw-3         | 50 |
| CS76221  | ROM-1         | 50 |
| CS76276  | UKNW06-060    | 50 |
| CS76281  | UKSE06-192    | 50 |
| CS76108  | CAM-61        | 60 |
| CS76109  | Can-0         | 60 |
| CS76129  | Fei-0         | 60 |
| CS76131  | Fjä1-2        | 60 |
| CS76137  | Gr-1          | 60 |
| CS76177  | Lp2-6         | 60 |
| CS76252  | TOU-A1-115    | 60 |
| CS76291  | UKSE06-628    | 60 |

|         |         |    |
|---------|---------|----|
| CS28049 | Ann-1   | 67 |
| CS28053 | Ba-1    | 67 |
| CS28135 | Chat-1  | 67 |
| CS28140 | CIBC-2  | 67 |
| CS28141 | CIBC-4  | 67 |
| CS28252 | Fi-1    | 67 |
| CS28344 | Hey-1   | 67 |
| CS28350 | Hn-0    | 67 |
| CS28373 | Jm-1    | 67 |
| CS28423 | Krot-2  | 67 |
| CS28459 | Li-6    | 67 |
| CS28614 | PHW-14  | 67 |
| CS28628 | PHW-28  | 67 |
| CS28631 | PHW-31  | 67 |
| CS28685 | Rhen-1  | 67 |
| CS28692 | Rou-0   | 67 |
| CS28734 | Sh-0    | 67 |
| CS28739 | Si-0    | 67 |
| CS28787 | Uk-1    | 67 |
| CS28795 | Utrecht | 67 |
| CS28800 | Ven-1   | 67 |
| CS28804 | Wa-1    | 67 |
| CS28812 | WAR     | 67 |
| CS76088 | Alc-0   | 67 |
| CS76090 | ALL1-3  | 67 |
| CS76093 | Bå1-2   | 67 |
| CS76094 | Bay-0   | 67 |
| CS76097 | Bla-1   | 67 |
| CS76101 | Br-0    | 67 |
| CS76104 | BUI     | 67 |
| CS76105 | Bur-0   | 67 |
| CS76124 | Duk     | 67 |
| CS76128 | Fåb-4   | 67 |
| CS76149 | Ka-0    | 67 |
| CS76159 | Lc-0    | 67 |
| CS76164 | Ler-1   | 67 |
| CS76169 | Lis-1   | 67 |
| CS76171 | Lisse   | 67 |
| CS76174 | Lom1-1  | 67 |
| CS76181 | MIB-15  | 67 |
| CS76195 | Na-1    | 67 |
| CS76200 | Ömö2-1  | 67 |
| CS76202 | Ost-0   | 67 |
| CS76203 | Oy-0    | 67 |
| CS76207 | PAR-5   | 67 |
| CS76226 | Se-0    | 67 |

|         |            |    |
|---------|------------|----|
| CS76227 | Shahdara   | 67 |
| CS76228 | SLSP-30    | 67 |
| CS76231 | St-0       | 67 |
| CS76232 | Ste-3      | 67 |
| CS76233 | T1040      | 67 |
| CS76234 | T1060      | 67 |
| CS76236 | T1110      | 67 |
| CS76244 | Tamm-2     | 67 |
| CS76254 | TOU-A1-12  | 67 |
| CS76257 | TOU-A1-67  | 67 |
| CS76262 | TOU-H-13   | 67 |
| CS76263 | TOU-I-17   | 67 |
| CS76280 | UKSE06-062 | 67 |
| CS76282 | UKSE06-272 | 67 |
| CS76288 | UKSE06-466 | 67 |
| CS76306 | Zdr-6      | 67 |
| CS28108 | Bu-8       | 80 |
| CS28241 | Es-0       | 80 |
| CS28420 | Kro-0      | 80 |
| CS28583 | Old-1      | 80 |
| CS28729 | Sei-0      | 80 |
| CS76086 | 627ME-4Y1  | 80 |
| CS76114 | Ct-1       | 80 |
| CS76115 | CUR-3      | 80 |
| CS76157 | LAC-3      | 80 |
| CS76184 | MIB-84     | 80 |
| CS76191 | Mrk-0      | 80 |
| CS76224 | Sap-0      | 80 |
| CS76230 | Sq-8       | 80 |
| CS76251 | Tottarp-2  | 80 |
| CS76259 | TOU-C-3    | 80 |
| CS76293 | Ull2-3     | 80 |
| CS76298 | Vår2-1     | 80 |
| CS28014 | Amel-1     | 83 |
| CS28017 | An-2       | 83 |
| CS28051 | Arby-1     | 83 |
| CS28064 | Benk-1     | 83 |
| CS28090 | Blh-2      | 83 |
| CS28099 | Bsch-0     | 83 |
| CS28165 | Co-4       | 83 |
| CS28193 | Com-1      | 83 |
| CS28200 | Da-0       | 83 |
| CS28243 | Est-0      | 83 |
| CS28268 | Fr-4       | 83 |
| CS28277 | Ge-1       | 83 |
| CS28279 | Gel-1      | 83 |

|         |               |    |
|---------|---------------|----|
| CS28364 | Je-0          | 83 |
| CS28369 | Jl-3          | 83 |
| CS28394 | Kl-5          | 83 |
| CS28457 | Li-5:2        | 83 |
| CS28490 | Mc-0          | 83 |
| CS28495 | Mnz-0         | 83 |
| CS28510 | N4            | 83 |
| CS28513 | N7            | 83 |
| CS28580 | Ob-1          | 83 |
| CS28610 | PHW-10        | 83 |
| CS28613 | PHW-13        | 83 |
| CS28620 | PHW-20        | 83 |
| CS28622 | PHW-22        | 83 |
| CS28636 | PHW-36        | 83 |
| CS28637 | PHW-37        | 83 |
| CS28640 | Pla-0         | 83 |
| CS28650 | Pog-0         | 83 |
| CS28743 | Sp-0          | 83 |
| CS28750 | Ste-0         | 83 |
| CS28779 | Tscha-1       | 83 |
| CS28788 | Uk-2          | 83 |
| CS28810 | Wag-5         | 83 |
| CS28814 | Wc-2          | 83 |
| CS28822 | WI-0          | 83 |
| CS28833 | Wt-3          | 83 |
| CS28848 | Ors-1         | 83 |
| CS28849 | Ors-2         | 83 |
| CS76083 | 11ME1.32      | 83 |
| CS76084 | 11PNA4.101    | 83 |
| CS76091 | An-1          | 83 |
| CS76095 | Belmonte-4-94 | 83 |
| CS76096 | Bg-2          | 83 |
| CS76099 | Bor-1         | 83 |
| CS76103 | Bu-0          | 83 |
| CS76110 | Cen-0         | 83 |
| CS76113 | Col-0         | 83 |
| CS76122 | DraIV         | 83 |
| CS76125 | Eden-2        | 83 |
| CS76126 | Edi-0         | 83 |
| CS76132 | Fjä1-5        | 83 |
| CS76134 | Gd-1          | 83 |
| CS76138 | Gul1-2        | 83 |
| CS76139 | Gy-0          | 83 |
| CS76140 | Hi-0          | 83 |
| CS76141 | Hod           | 83 |
| CS76144 | HR-5          | 83 |

|         |            |    |
|---------|------------|----|
| CS76145 | Hs-0       | 83 |
| CS76148 | JEA        | 83 |
| CS76151 | KBS-Mac-8  | 83 |
| CS76155 | Köln       | 83 |
| CS76161 | LDV-25     | 83 |
| CS76163 | LDV-58     | 83 |
| CS76168 | Lip-0      | 83 |
| CS76170 | Lis-2      | 83 |
| CS76176 | Lp2-2      | 83 |
| CS76180 | Map-42     | 83 |
| CS76185 | MNF-Che-2  | 83 |
| CS76186 | MNF-Jac-32 | 83 |
| CS76187 | MNF-Pot-48 | 83 |
| CS76188 | MNF-Pot-68 | 83 |
| CS76192 | Mt-0       | 83 |
| CS76193 | Mz-0       | 83 |
| CS76197 | Nd-1       | 83 |
| CS76205 | PAR-3      | 83 |
| CS76209 | Pent-1     | 83 |
| CS76210 | Per-1      | 83 |
| CS76211 | Petergof   | 83 |
| CS76215 | Pu2-23     | 83 |
| CS76216 | Ra-0       | 83 |
| CS76217 | Rak-2      | 83 |
| CS76220 | Rmx-A180   | 83 |
| CS76222 | Rsch-4     | 83 |
| CS76225 | Sav-0      | 83 |
| CS76229 | Sparta-1   | 83 |
| CS76235 | T1080      | 83 |
| CS76239 | T540       | 83 |
| CS76247 | TDr-18     | 83 |
| CS76248 | TDr-3      | 83 |
| CS76253 | TOU-A1-116 | 83 |
| CS76256 | TOU-A1-62  | 83 |
| CS76264 | TOU-I-2    | 83 |
| CS76265 | TOU-I-6    | 83 |
| CS76272 | UKID37     | 83 |
| CS76273 | UKID48     | 83 |
| CS76278 | UKNW06-436 | 83 |
| CS76279 | UKNW06-460 | 83 |
| CS76283 | UKSE06-278 | 83 |
| CS76284 | UKSE06-349 | 83 |
| CS76286 | UKSE06-414 | 83 |
| CS76289 | UKSE06-482 | 83 |
| CS76292 | UKSW06-202 | 83 |
| CS76297 | Van-0      | 83 |

|         |               |     |
|---------|---------------|-----|
| CS76299 | VOU-1         | 83  |
| CS76300 | VOU-2         | 83  |
| CS76302 | Wil-1         | 83  |
| CS76304 | Wt-5          | 83  |
| CS76305 | Yo-0          | 83  |
| CS76308 | Zdrl          | 83  |
| CS76213 | Pna-17        | 86  |
| CS22689 | RRS-10        | 100 |
| CS28007 | Aa-0          | 100 |
| CS28013 | Alst-1        | 100 |
| CS28018 | Ang-0         | 100 |
| CS28054 | Baa-1         | 100 |
| CS28063 | Be-1          | 100 |
| CS28128 | Ca-0          | 100 |
| CS28133 | Cha-0         | 100 |
| CS28142 | CIBC-5        | 100 |
| CS28158 | Cit-0         | 100 |
| CS28181 | CSHL-5        | 100 |
| CS28201 | Da(1)-12      | 100 |
| CS28202 | Db-0          | 100 |
| CS28208 | Di-1          | 100 |
| CS28210 | Do-0          | 100 |
| CS28236 | Ep-0          | 100 |
| CS28280 | Gie-0         | 100 |
| CS28282 | Go-0          | 100 |
| CS28326 | Gr-5          | 100 |
| CS28332 | Gu-1          | 100 |
| CS28336 | Ha-0          | 100 |
| CS28382 | Kelsterbach-2 | 100 |
| CS28395 | Kn-0          | 100 |
| CS28407 | KNO-11        | 100 |
| CS28454 | Li-3          | 100 |
| CS28461 | Li-7          | 100 |
| CS28527 | Nc-1          | 100 |
| CS28550 | NFC-20        | 100 |
| CS28564 | No-0          | 100 |
| CS28568 | Nok-1         | 100 |
| CS28573 | Nw-0          | 100 |
| CS28575 | Nw-2          | 100 |
| CS28578 | Nz1           | 100 |
| CS28587 | Or-0          | 100 |
| CS28626 | PHW-26        | 100 |
| CS28651 | Pr-0          | 100 |
| CS28663 | Pu2-24        | 100 |
| CS28713 | RRS-7         | 100 |
| CS28720 | S96           | 100 |

|         |           |     |
|---------|-----------|-----|
| CS28724 | Sapporo-0 | 100 |
| CS28732 | Sg-1      | 100 |
| CS28760 | Tiv-1     | 100 |
| CS28780 | Tsu-0     | 100 |
| CS28786 | Ty-0      | 100 |
| CS28809 | Wag-4     | 100 |
| CS28847 | Zu-1      | 100 |
| CS76085 | 328PNA054 | 100 |
| CS76087 | Ag-0      | 100 |
| CS76089 | ALL1-2    | 100 |
| CS76092 | App1-16   | 100 |
| CS76100 | Bor-4     | 100 |
| CS76102 | Brö1-6    | 100 |
| CS76111 | CIBC-17   | 100 |
| CS76116 | Cvi-0     | 100 |
| CS76119 | DraIV     | 100 |
| CS76120 | DraIV     | 100 |
| CS76121 | DraIV     | 100 |
| CS76123 | DraIV     | 100 |
| CS76135 | Ge-0      | 100 |
| CS76136 | Got-7     | 100 |
| CS76142 | Hov4-1    | 100 |
| CS76143 | Hovdala-2 | 100 |
| CS76146 | HSm       | 100 |
| CS76147 | In-0      | 100 |
| CS76153 | Kin-0     | 100 |
| CS76154 | Kno-18    | 100 |
| CS76156 | Nordborg  | 100 |
| CS76158 | LAC-5     | 100 |
| CS76160 | LDV-14    | 100 |
| CS76162 | LDV-34    | 100 |
| CS76166 | Liarum    | 100 |
| CS76167 | Lillö-1   | 100 |
| CS76173 | Lm-2      | 100 |
| CS76175 | Löv-5     | 100 |
| CS76179 | Lz-0      | 100 |
| CS76182 | MIB-22    | 100 |
| CS76183 | MIB-28    | 100 |
| CS76189 | MOG-37    | 100 |
| CS76194 | N13       | 100 |
| CS76198 | NFA-10    | 100 |
| CS76199 | NFA-8     | 100 |
| CS76201 | Ör-1      | 100 |
| CS76206 | PAR-4     | 100 |
| CS76212 | PHW-34    | 100 |
| CS76218 | Ren-1     | 100 |



|         |            |     |
|---------|------------|-----|
| CS76219 | Rev-2      | 100 |
| CS76223 | Sanna-2    | 100 |
| CS76238 | T510       | 100 |
| CS76240 | T620       | 100 |
| CS76242 | Ta-0       | 100 |
| CS76243 | TÅD        | 100 |
| CS76245 | TDr-1      | 100 |
| CS76249 | TDr-8      | 100 |
| CS76250 | Tomegap-2  | 100 |
| CS76255 | TOU-A1-43  | 100 |
| CS76258 | TOU-A1-96  | 100 |
| CS76260 | TOU-E-11   | 100 |
| CS76261 | TOU-H-12   | 100 |
| CS76266 | TOU-J-3    | 100 |
| CS76267 | TOU-K-3    | 100 |
| CS76268 | Ts-1       | 100 |
| CS76269 | Udul       | 100 |
| CS76270 | UKID101    | 100 |
| CS76274 | UKID80     | 100 |
| CS76275 | UKNW06-059 | 100 |
| CS76277 | UKNW06-386 | 100 |
| CS76285 | UKSE06-351 | 100 |
| CS76290 | UKSE06-520 | 100 |
| CS76295 | UII3-4     | 100 |
| CS76296 | Uod-7      | 100 |
| CS76301 | Wei-0      | 100 |
| CS76303 | Ws-0       | 100 |
| CS76307 | Zdrl       | 100 |

**Table S3.** Aphid feeding behaviour, measured by 8-hour EPG recordings on wild type (Col-0) and *wrky22* T-DNA lines (*wrky22-3* and *wrky22-4*).

| Tissue              | Variable                                  | Col-0        | <i>wrky22-3</i>      | <i>wrky22-4</i>       |
|---------------------|-------------------------------------------|--------------|----------------------|-----------------------|
| Epidermis/mesophyll | Total duration NP (min)                   | 111.6 ± 11.8 | 105.5 ± 13.6ns       | 153.1 ± 17.2ns        |
|                     | Latency to 1st C (min)                    | 6 ± 1.2      | 7.5 ± 1.8ns          | 12.4 ± 2.5ns          |
|                     | Total duration C (min)                    | 167.5 ± 11.2 | <b>197.6 ± 12.8*</b> | 192 ± 14.1ns          |
|                     | Number of C                               | 43.1 ± 4.4   | 41.4 ± 4.9ns         | 51.6 ± 5.5ns          |
|                     | Number of C < 3 min                       | 29.3 ± 4.1   | 25.5 ± 4.2ns         | 38 ± 4.9ns            |
|                     | Number of C < 20 sec                      | 12.1 ± 2.5   | 8 ± 2.1ns            | 17.6 ± 2.9ns          |
|                     | Mean duration C (min)                     | 4.6 ± 0.4    | <b>6.7 ± 1*</b>      | 4.4 ± 0.4ns           |
|                     | Potential drops in C (min <sup>-1</sup> ) | 1.2 ± 0      | 1.2 ± 0ns            | 1.2 ± 0.1ns           |
|                     | Total duration F (min)                    | 2.8 ± 2.8    | 0 ± 0ns              | 6.2 ± 4.4ns           |
|                     | Number of F                               | 0.1 ± 0.1    | 0.1 ± 0.1ns          | 0.4 ± 0.2ns           |
| Vascular bundle     | Latency to 1st E1 after C (min)           | 67.8 ± 7.3   | 74.9 ± 8.1ns         | 119.8 ± 23.7ns        |
|                     | Mean latency E1 after C (min)             | 10.5 ± 0.7   | 12.7 ± 1.3ns         | 14.2 ± 1.6ns          |
|                     | Total duration E1 (min)                   | 10.4 ± 1.3   | 13.3 ± 1.7ns         | 7.1 ± 0.6ns           |
|                     | Number of E1                              | 11.3 ± 1.4   | 12.5 ± 1.3ns         | 8.1 ± 0.9ns           |
|                     | Mean duration E1 (min)                    | 1.1 ± 0.2    | 1.2 ± 0.2ns          | 1 ± 0.1ns             |
|                     | Number of single E1                       | 1.2 ± 0.3    | 1.4 ± 0.3ns          | 1.4 ± 0.3ns           |
|                     | E1 in E (%)                               | 8.4 ± 1.5    | 10.8 ± 1.7ns         | 12.7 ± 3.6ns          |
|                     | Latency to 1st E2 (min)                   | 96.5 ± 12.5  | 107.3 ± 17.8ns       | 144.1 ± 24.6ns        |
|                     | Total duration E2 (min)                   | 168.3 ± 19.9 | 154 ± 21.3ns         | 117.9 ± 24.1ns        |
|                     | Number of E2                              | 8.2 ± 1      | 9 ± 0.9ns            | 5.8 ± 0.8ns           |
|                     | Mean duration E2 (min)                    | 32.5 ± 7     | 41.8 ± 21ns          | 24.1 ± 6.9ns          |
|                     | Total duration E2s (min)                  | 148.8 ± 20.9 | 129.1 ± 22.9ns       | 103.5 ± 24.1ns        |
|                     | Aphids with E2 (%)                        | 100 ± 0      | 100 ± 0ns            | 100 ± 0ns             |
|                     | E2/C ratio                                | 1.3 ± 0.3    | 1.6 ± 0.8ns          | <b>1 ± 0.4*</b>       |
|                     | Latency to vascular bundle (min)          | 69.3 ± 6.5   | 78.7 ± 8.6ns         | <b>130.2 ± 22.5**</b> |
|                     | Total duration G (min)                    | 19.4 ± 6.3   | 9.5 ± 3.8ns          | <b>3.6 ± 1.8*</b>     |
|                     | Number of G                               | 0.6 ± 0.2    | 0.4 ± 0.1ns          | 0.2 ± 0.1ns           |

Means ± standard error, \*P<0.05; \*\*P<0.01; \*\*\*P<0.001 (Mann-Whitney U pairwise comparisons: *wrky22-3* versus Col-0 and *wrky22-4* versus Col-0. NP = non-penetration, C = pathway, , F = penetration difficulties, E1 = phloem salivation, E2 = phloem ingestion, E2s = sustained phloem ingestion (> 10 min), G = xylem ingestion. Single E1s were phloem salivations that were not directly followed or preceded by phloem uptake. Latency to the vascular bundle was calculated as the time from the start of the recording to the first contact with either a phloem or xylem vessel.

**Table S4.** Aphid feeding behaviour, measured by 8-hour EPG recordings on wild type (Col-0) and *wrky22* inducible overexpression lines (OE.c and OE.e). *WRKY22* overexpression was induced by supplying estradiol solution to all plants 24 hours before the experiment.

| Tissue              | Variable                         | Col-0        | OE.c                 | OE.e           |
|---------------------|----------------------------------|--------------|----------------------|----------------|
| Epidermis/mesophyll | Total duration NP (min)          | 171.6 ± 20.5 | 178.5 ± 20ns         | 160.6 ± 16.4ns |
|                     | Latency to 1st C (min)           | 16.3 ± 3.4   | 12.6 ± 2.6ns         | 17 ± 4.7ns     |
|                     | Total duration C (min)           | 179.9 ± 9.6  | 164.6 ± 8.2ns        | 158.1 ± 8.4ns  |
|                     | Number of C                      | 43.2 ± 4.7   | 39.5 ± 3.8ns         | 39.4 ± 3.3ns   |
|                     | Number of C < 3 min              | 30.3 ± 4.5   | 27.5 ± 3.9ns         | 27.7 ± 3ns     |
|                     | Number of C < 20 sec             | 13.1 ± 2.5   | 11.7 ± 2.5ns         | 12.1 ± 1.7ns   |
|                     | Mean duration C (min)            | 5 ± 0.6      | 4.7 ± 0.4ns          | 4.3 ± 0.3ns    |
|                     | Total duration F (min)           | 14.2 ± 8.8   | 8.3 ± 4.8ns          | 0.7 ± 0.6ns    |
|                     | Number of F                      | 0.5 ± 0.3    | 0.6 ± 0.2ns          | 0.2 ± 0.1ns    |
| Vascular bundle     | Latency to 1st E1 after C (min)  | 139.5 ± 21   | 94.9 ± 19ns          | 104.6 ± 13.2ns |
|                     | Mean latency E1 after C (min)    | 13.2 ± 1.2   | 11.5 ± 0.7ns         | 13.6 ± 1.4ns   |
|                     | Total duration E1 (min)          | 6.6 ± 0.7    | 8.3 ± 1.2ns          | 8.5 ± 1.2ns    |
|                     | Number of E1                     | 8.9 ± 1.3    | 11.6 ± 1.2ns         | 9.6 ± 1ns      |
|                     | Mean duration E1 (min)           | 0.8 ± 0.1    | 0.7 ± 0ns            | 0.9 ± 0.1ns    |
|                     | Number of single E1              | 1 ± 0.2      | 0.8 ± 0.3ns          | 1 ± 0.3ns      |
|                     | E1 in E (%)                      | 11.3 ± 2.9   | 9.3 ± 1.6ns          | 7.4 ± 1.4ns    |
|                     | Latency to 1st E2 (min)          | 170.3 ± 24   | <b>108.8 ± 18.7*</b> | 130.9 ± 16.9ns |
|                     | Total duration E2 (min)          | 107.7 ± 23.4 | 120.3 ± 17.1ns       | 150.1 ± 17.8ns |
|                     | Number of E2                     | 6.8 ± 1.1    | 9.4 ± 1ns            | 7.6 ± 1ns      |
|                     | Mean duration E2 (min)           | 19.2 ± 5.2   | 12.5 ± 1.7ns         | 25.4 ± 4.5ns   |
|                     | Total duration E2s (min)         | 91.7 ± 24.3  | 89.6 ± 15.5ns        | 131 ± 17.9ns   |
|                     | Aphids with E2 (%)               | 100 ± 0      | 100 ± 0ns            | 100 ± 0ns      |
|                     | E2/C ratio                       | 0.7 ± 0.2    | 0.8 ± 0.1ns          | 1 ± 0.2ns      |
|                     | Latency to vascular bundle (min) | 155.7 ± 21.2 | <b>107.5 ± 18.8*</b> | 118.6 ± 14.7ns |
|                     | Total duration G (min)           | 0 ± 0        | 0 ± 0ns              | 2.1 ± 2ns      |
|                     | Number of G                      | 0 ± 0        | 0 ± 0ns              | 0.1 ± 0.1ns    |

Means ± standard error, \*P<0.05; \*\*P<0.01; \*\*\*P<0.001 (Mann-Whitney U pairwise comparisons: OE.c versus Col-0 and OE.e versus Col-0. NP = non-penetration, C = pathway, , F = penetration difficulties, E1 = phloem salivation, E2 = phloem ingestion, E2s = sustained phloem ingestion (> 10 min), G = xylem ingestion. Single E1s were phloem salivations that were not directly followed or preceded by phloem uptake. Latency to the vascular bundle was calculated as the time from the start of the recording to the first contact with either a phloem or xylem vessel.
